# Supplementary material
Source: PubMed Central journal article supplement (PMC3070574)

**A**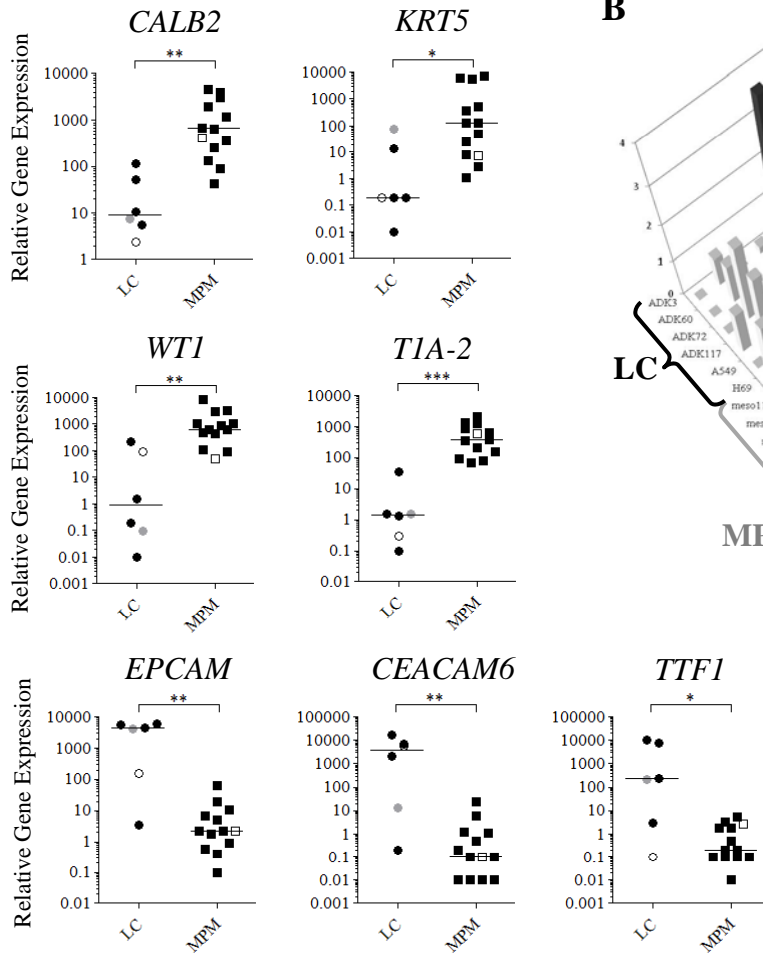**B**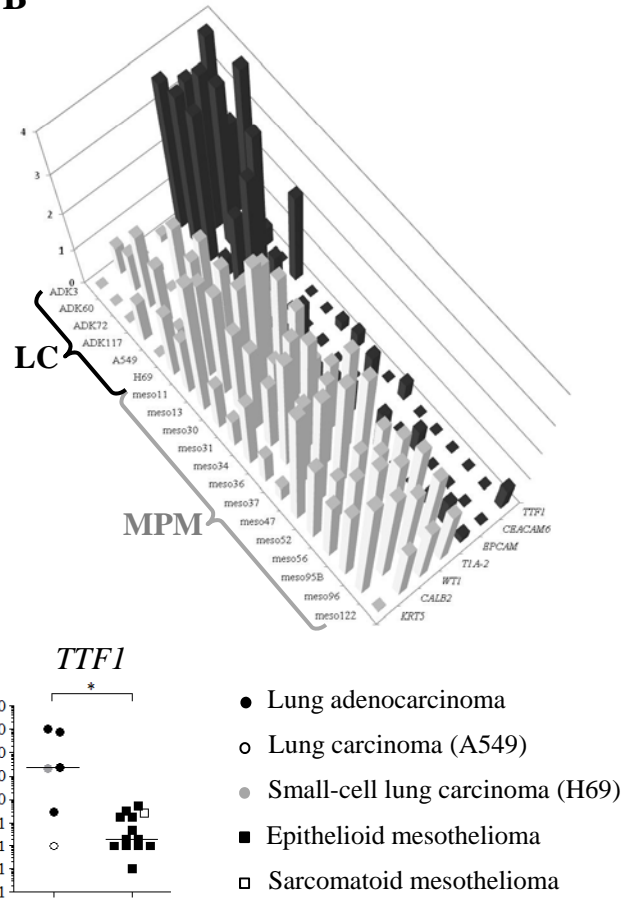**C**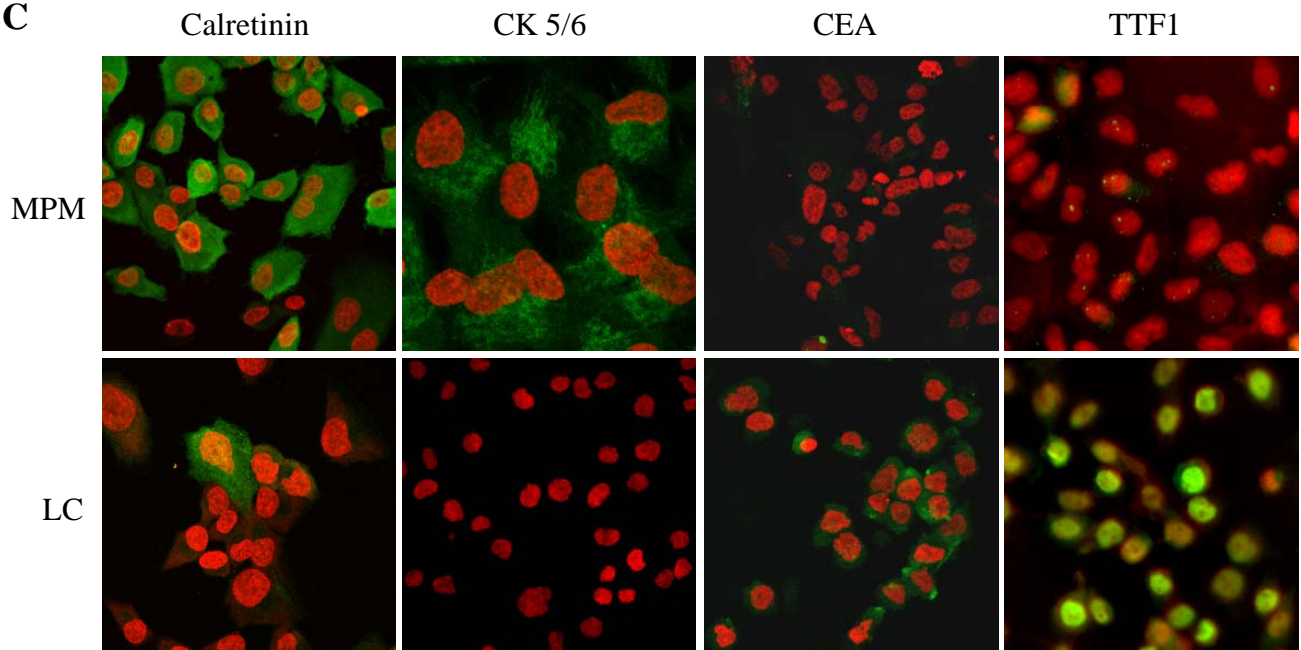

Supplement: mmc1.pdf [file mmc1.pdf]
